# Supplementary material
Source: Springer Nature journal article supplement (https://www.springermedizin.de/resource/supplementary/12906_2012_1107_MOESM5_ESM.pdf/9520344)

**A**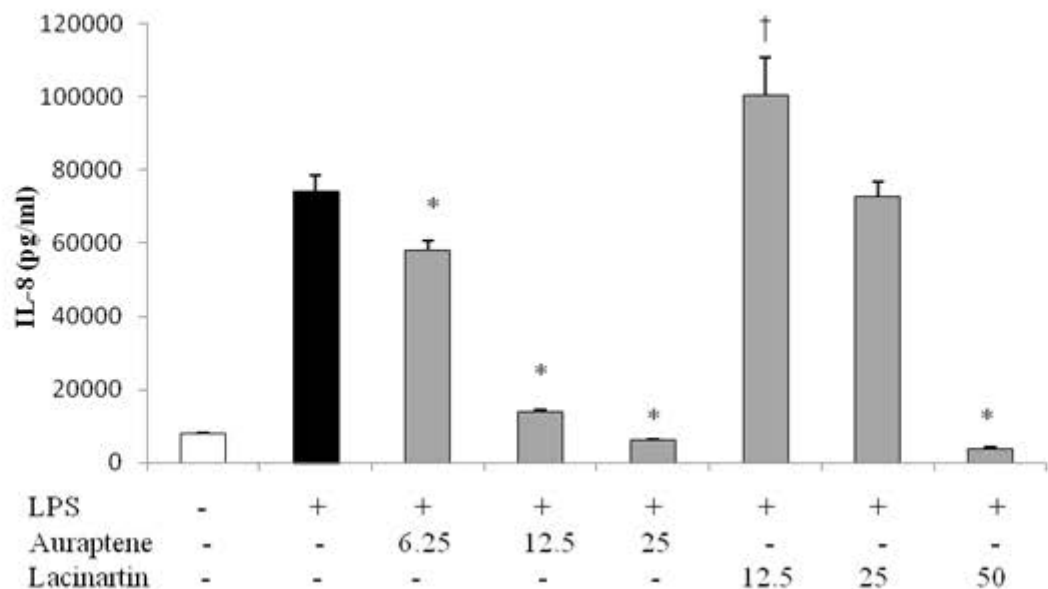**B**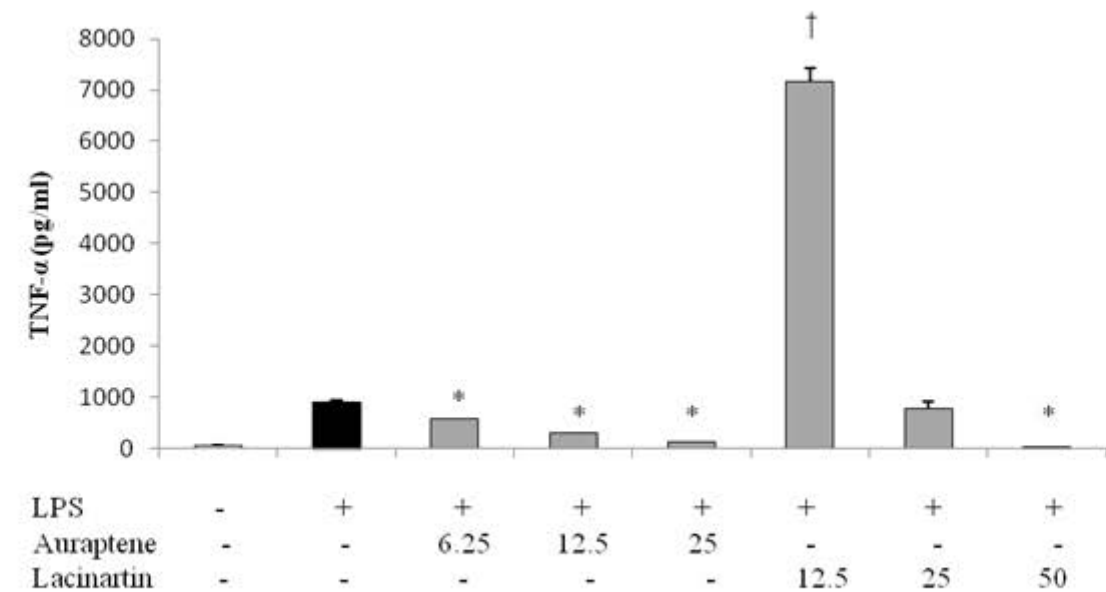

Supplement: MOESM5 [file 9520344]
